# Supplementary material
Source: HighWire-hosted journal article supplement (doi:10.1101/rna.078858.121)
Supplement: Supplemental_Movie_Legends.docx [file Supplemental_Movie_Legends.docx]

(Supplemental Movie 1) 3D rendering of intact cell with 180° view of SGs corresponding to Figure 2D,E (unfractionated) depicting *GRP94* smFISH (magenta) and immunostaining for the ER membrane protein TRAPα (yellow) and stress granule protein marker G3BP1 (cyan). DAPI staining (blue) identifies the nucleus. TRAPα and G3BP1 are represented as transparent objects to enable visualization of granule association with the ER membrane and colocalization of *GRP94* mRNA with G3BP1.

(Supplemental Movie 2) 3D rendering of digitonin-permeabilized cell with 180° view of SG corresponding to Figure 2D,E (digitonin) depicting *GRP94* smFISH (magenta) and immunostaining for the ER membrane protein TRAPα (yellow) and stress granule protein marker G3BP1 (cyan). DAPI staining (blue) identifies the nucleus. TRAPα and G3BP1 are represented as transparent objects to enable visualization of granule association with the ER membrane and colocalization of *GRP94* mRNA with G3BP1.
